# Supplementary material
Source: HighWire-hosted journal article supplement (https://bmjopen.bmj.com/content/14/8/e082547)
Supplement: inline-supplementary-material-1 [file inline-supplementary-material-1.pdf]

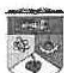

UNIVERSITI KEBANGSAAN MALAYSIA

*The National University of Malaysia*

CENTER FOR RESEARCH AND INSTRUMENTATION MANAGEMENT CENTER FOR RESEARCH AND INSTRUMENTATION MANAGEMENT

Reference: UKM PPI/111/8/JEP-2022-777

Date: January 13, 2023

Associate Major (PA) Dr. Roszita Ibrahim  
Department of Community  
Health Chancellor Tuanku Muhriz  
Hospital UKM Medical Center

Y. Bhg. Professor/Datuk/Dato'/Datin/Sir/Madam,

## ETHICS APPROVAL OF CONDUCTING RESEARCH AT UKM

Tajuk Penyelidikan : *Critical Success Factors And The Acceptance Of Casemix System Implementation In Total Hospital Information System Of The Ministry Of Health Malaysia*

The above is referred to.

2. Pleased to be informed, the UKM Research Ethics Committee approved the research application of Y. Bhg. Professor/Datuk/Dato'/Datin/Sir/Madam for the title above. The research approval period is from January 12, 2023 to January 11, 2025. Please submit any Side Effects Report, Progress Report Every 6 Months and Final Report as soon as the research is finished to the UKM Research Ethics Committee.

3. Please be reminded that this research project can only be carried out after receiving a letter of approval to carry out research from the Faculty's Deputy Dean of Research or Center/Institute Director.

Thank you.

Yours sincerely,

  
Chairman  
of the Research Ethics Committee of  
the National University of Malaysia

- s.k.
- Director of  
the Center for Research Management and Instrumentation (CRIM)  
of Universiti Kebangsaan Malaysia
  - Director  
Tuanku Muhriz Chancellor Hospital,  
UKM Medical Center
  - Deputy Dean (Research & Innovation)  
Secretariat of Medical Research & Innovation  
Chancellor Tuanku Muhriz  
Hospital UKM Medical Center

Universiti Kebangsaan Malaysia Research Ethics Secretariat 1st  
Floor, Tuanku Muhriz Chancellor Hospital Clinical Block, UKM Medical Center, Jalan Yaacob Latif, Bandar Tun Razak, 56000 Cheras Kuala Lumpur.  
Phone: +603-9145 5046/5048

Email: [sepukm@ukm.edu.my](mailto:sepukm@ukm.edu.my) Web: <http://research.ukm.my/jepukm/>

Inspiring Hope, Creating the Future Inspiring Futures, Nurturing Possibilities

[www.ukm.my](http://www.ukm.my)

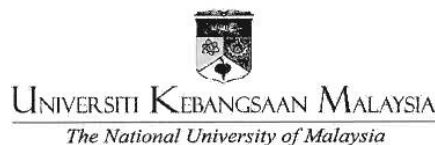

## PUSAT PENGURUSAN PENYELIDIKAN DAN INSTRUMENTASI • CENTRE FOR RESEARCH AND INSTRUMENTATION MANAGEMENT

- **Ketua Jabatan Kesihatan Masyarakat**  
Hospital Canselor Tuanku Muhriz  
Pusat Perubatan UKM
- **Profesor Dato' Dr. Syed Mohamed Aljuni Syed Junid**  
*Senior Public Health Medicine Consultant*  
*Professor of Health Economics*  
*Policy and Management Founding Chair Department of Health Policy and Management*  
*Faculty of Public Health*  
*Kuwait University*
- **Profesor Madya Dr. Azimatun Noor Aizuddin**
- **Dr. Noor Khairiyah Mustafa (P115190 – Calon PhD)**  
Jabatan Kesihatan Masyarakat  
Hospital Canselor Tuanku Muhriz  
Pusat Perubatan UKM
- Fail Surat Kelulusan 2022

FI/FMZ

Sekretariat Etika Penyelidikan Universiti Kebangsaan Malaysia  
Tingkat 1, Blok Klinikal, Hospital Canselor Tuanku Muhriz, Pusat Perubatan UKM, Jalan Yaacob Latif, Bandar Tun Razak, 56000 Cheras Kuala Lumpur.  
Telefon: +603-9145 5046 / 5048  
Email: [sepukm@ukm.edu.my](mailto:sepukm@ukm.edu.my) Web: <http://research.ukm.my/jepukm/>

Mengilham Harapan, Mencipta Masa Depan • *Inspiring Futures, Nurturing Possibilities*[www.ukm.my](http://www.ukm.my)

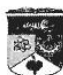

UNIVERSITI KEBANGSAAN MALAYSIA  
The National University of Malaysia

PUSAT PENGURUSAN PENYELIDIKAN DAN INSTRUMENTASI • CENTRE FOR RESEARCH AND INSTRUMENTATION MANAGEMENT

|                                                                                                                                                                                |                                                                        |
|--------------------------------------------------------------------------------------------------------------------------------------------------------------------------------|------------------------------------------------------------------------|
| <b>NAME OF ETHICS COMMITTEE/IRB:</b><br>Research Ethics Committee,<br>The National University of Malaysia                                                                      | <b>ETHICS COMMITTEE/IRB<br/>REF NO :</b><br>UKM PPI/111/8/JEP-2022-777 |
| <b>PROTOCOL TITLE:</b><br>Critical Success Factors And The Acceptance Of Casemix System Implementation In Total Hospital Information System Of The Ministry Of Health Malaysia |                                                                        |
| <b>PRINCIPAL INVESTIGATOR:</b><br>Mejar Bersekutu (PA) Dr. Roszita Ibrahim<br>Department of Community Health<br>Hospital Canselor Tuanku Muhriz<br>UKM Medical Centre          |                                                                        |

The following items ☒ have been received and reviewed in connection with the above study to be conducted by the above investigator.

**Documents**

- ☒ Research Application Form  
☒ Research Proposal / Protocol  
☐ Publication Policy  
☒ Non-Disclosure Agreement  
 Information Sheet:-  
☒ Malay ☒ English  
 Consent Form:-  
☒ Malay ☒ English  
 Questionnaire:-  
☒ Malay ☒ English  
 Curriculum Vitae of Researcher:-  
☒ Principal ☒ Co-researcher ☒ Student  
☒ Good Clinical Practice Certificate (GCP)  
☐ Project Agreement

The Research Ethics Committee, The National University of Malaysia operates in accordance to the International Conference of Harmonization Good Clinical Practice Guidelines.

Comments (if any): Associate Professor Dr. Azimatun Noor Aizuddin is the co-investigator for this study and also member of Research Ethics Committee. She strictly was not involved in the decision of Research Ethics Committee to approve this study.

**Date of Approval: 12 January 2023**

Chairman  
Research Ethics Committee  
The National University of Malaysia

Sekretariat Etika Penyelidikan Universiti Kebangsaan Malaysia  
Tingkat 1, Blok Klinikal, Hospital Canselor Tuanku Muhriz, Pusat Perubatan UKM, Jalan Yaacob Latif, Bandar Tun Razak, 56000 Cheras Kuala Lumpur.  
Telefon: +603-9145 5046 / 5048  
Email: [sepukm@ukm.edu.my](mailto:sepukm@ukm.edu.my) Web: <http://research.ukm.my/jepukm/>

Mengilham Harapan, Mencipta Masa Depan • Inspiring Futures, Nurturing Possibilities

[www.ukm.my](http://www.ukm.my)
