# Supplementary material
Source: HighWire-hosted journal article supplement (https://bmjopen.bmj.com/content/14/8/e082547)
Supplement: inline-supplementary-material-9 [file inline-supplementary-material-9.pdf]

Supplementary 9:

Table I: The number of components formed and the amount of variance for every component

| Component | Initial Eigenvalues |               |              | Rotation Sums of Squared Loadings |               |              |
|-----------|---------------------|---------------|--------------|-----------------------------------|---------------|--------------|
|           | Total               | % of Variance | Cumulative % | Total                             | % of Variance | Cumulative % |
| 1         | 13.939              | 33.187        | 33.187       | 5.945                             | 14.155        | 14.155       |
| 2         | 6.159               | 14.665        | 47.852       | 4.477                             | 10.660        | 24.815       |
| 3         | 4.475               | 10.656        | 58.507       | 4.213                             | 10.030        | 34.845       |
| 4         | 3.046               | 7.252         | 65.760       | 4.029                             | 9.594         | 44.438       |
| 5         | 2.351               | 5.597         | 71.357       | 3.834                             | 9.129         | 53.568       |
| 6         | 1.635               | 3.893         | 75.250       | 3.384                             | 8.058         | 61.626       |
| 7         | 1.513               | 3.603         | 78.853       | 3.336                             | 7.943         | 69.569       |
| 8         | 1.184               | 2.820         | 81.673       | 3.314                             | 7.892         | 77.460       |
| 9         | 1.007               | 2.398         | 84.070       | 2.776                             | 6.610         | 84.070       |

Extraction Method: Principal Component Analysis

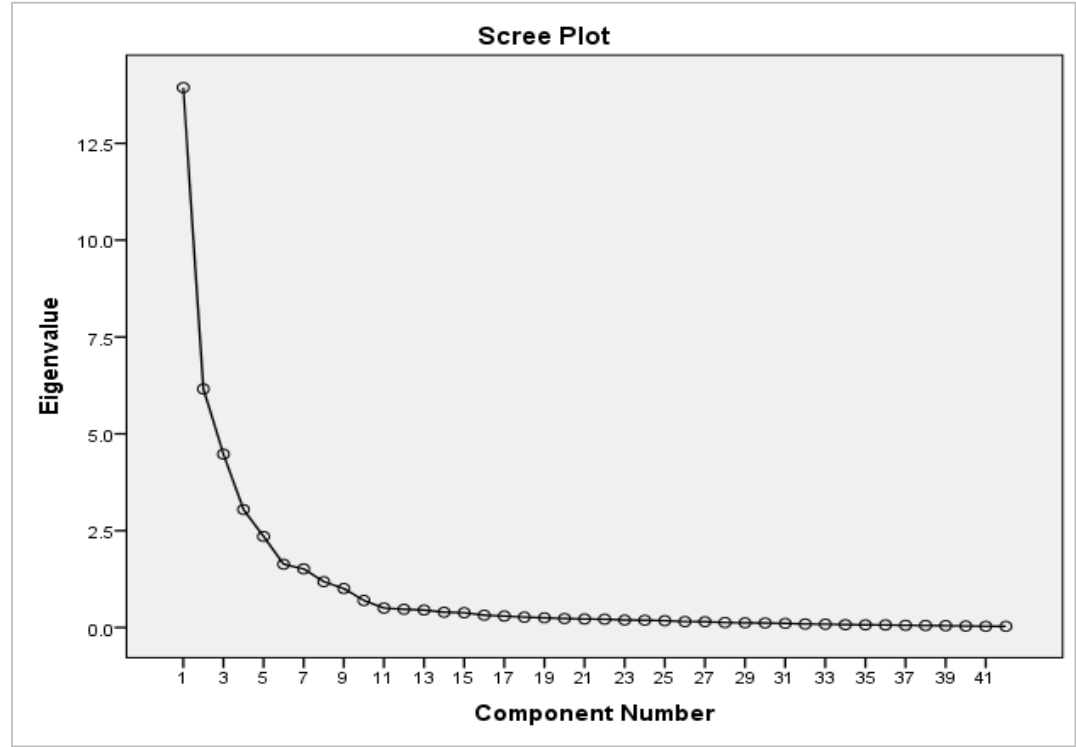

Figure I: The scree-plot indicates nine components emerged for the constructs
